# Supplementary material for: A hybrid halide lead-free pseudo-perovskite with large birefringence
Source: Royal Society of Chemistry journal article supplement (doi:10.1039/d2qi02738k), 2023-01-01
Supplement: d2qi02738k1.pdf [file d2qi02738k1.pdf]

## Supporting Information

### A Hybrid Halide Lead-Free Pseudo-Perovskite with Large Birefringence

Weiqi Huang,<sup>a,c</sup> Xiaolong Wu,<sup>a,c</sup> Belal Ahmed,<sup>e</sup> Yanqiang Li,<sup>c</sup> Yang Zhou,<sup>c</sup> Han Wang,<sup>c</sup>  
Yipeng Song,<sup>c</sup> Xiaojun Kuang,<sup>b</sup> Junhua Luo,<sup>c,d</sup> and Sangen Zhao<sup>c,d,\*</sup>

<sup>a</sup>College of Chemical Engineering, Fuzhou University, Fuzhou 350116, China

<sup>b</sup>College of Materials Science and Engineering, Guilin University of Technology, Guilin 541004, China

<sup>c</sup>State Key Laboratory of Structural Chemistry, Fujian Institute of Research on the Structure of Matter, Chinese Academy of Sciences, Fuzhou 350002, China

<sup>d</sup>Fujian Science & Technology Innovation Laboratory for Optoelectronic Information of China, Fuzhou 350108, China

<sup>e</sup>Department of Chemistry, Shahjalal University of Science and Technology, Sylhet-3114, Bangladesh.

## CONTENTS

|                                                                                                                                                               |    |
|---------------------------------------------------------------------------------------------------------------------------------------------------------------|----|
| Structure Determination.....                                                                                                                                  | 1  |
| Powder X-ray diffraction Analysis.....                                                                                                                        | 1  |
| Elemental Analysis.....                                                                                                                                       | 1  |
| Thermal Stability.....                                                                                                                                        | 2  |
| UV-Vis-NIR Diffuse Reflectance Spectroscopy.....                                                                                                              | 2  |
| IR Analysis.....                                                                                                                                              | 2  |
| Birefringence Measurements.....                                                                                                                               | 3  |
| Computational Methods.....                                                                                                                                    | 3  |
| Figure S1. The observed dihedral angle in the compound between melamine cationic planes.....                                                                  | 5  |
| Figure S2. The photograph of the synthesized colorless transparent single crystals.....                                                                       | 5  |
| Figure S3. Experimental and calculated PXRD patterns of MLASnCl <sub>4</sub> .....                                                                            | 6  |
| Figure S4. Energy dispersive X-ray (EDX) analysis of MLASnCl <sub>4</sub> .....                                                                               | 6  |
| Figure S5. TG and DTA diagrams of MLASnCl <sub>4</sub> .....                                                                                                  | 7  |
| Figure S6. UV-vis-NIR-infrared diffuse reflectance spectrum of MLASnCl <sub>4</sub> .....                                                                     | 7  |
| Figure S7. IR spectrum of MLASnCl <sub>4</sub> .....                                                                                                          | 8  |
| Figure S8. The thickness of the selected MLASnCl <sub>4</sub> crystal plate.....                                                                              | 8  |
| Figure S9. The crystal orientation of the selected MLASnCl <sub>4</sub> plate determined by single-crystal XRD.....                                           | 9  |
| Table S1. Crystallographic data and structure refinement for MLASnCl <sub>4</sub> .....                                                                       | 10 |
| Table S2. Atomic coordinates ( $\times 10^4$ ) and equivalent isotropic displacement parameters ( $\text{\AA}^2 \times 10^3$ ) for MLASnCl <sub>4</sub> ..... | 11 |
| Table S3. Selected bond distances ( $\text{\AA}$ ) for MLASnCl <sub>4</sub> .....                                                                             | 12 |
| Table S4. Selected bond angles (deg.) for MLASnCl <sub>4</sub> .....                                                                                          | 12 |
| Table S5. Anisotropic displacement parameters ( $\text{\AA}^2$ ) for MLASnCl <sub>4</sub> .....                                                               | 13 |
| Table S6. The bond valence sum (BVS) for all atoms in [SnCl <sub>4</sub> ] unit for MLASnCl <sub>4</sub> .....                                                | 14 |
| References.....                                                                                                                                               | 14 |

### **Structure Determination.**

A suitable colorless crystal of  $\text{MLASnCl}_4$  ( $0.12 \times 0.10 \times 0.06 \text{ mm}^3$ ) was selected for single-crystal X-ray diffraction (SCRD) data collection. The SCRD diffraction data was collected on a Bruker D8 diffractometer using Mo  $K\alpha$  radiation ( $\lambda = 0.71073 \text{ \AA}$ ) at 298.4(3) K. The data reduction and absorption corrections were carried out with the program APEX3. The crystal structure was solved by the direct method with the program SHELXS and refined with the least-squares program SHELXL.<sup>1</sup> Final refinement included anisotropic displacement parameters. The structure was checked for the symmetry elements using the program PLATON,<sup>2</sup> and no higher symmetry was found. Details of crystallographic parameters, data collection, and structure refinement are summarized in Table S1. The atomic coordinates and equivalent isotropic displacement parameters are listed in Table S2. The selected bond distances and angles are given in Table S3 and Table S4, and the anisotropic displacement parameters are presented in Table S5.

### **Powder X-ray diffraction Analysis.**

Powder X-ray diffraction (PXRD) measurement for the sample of  $\text{MLASnCl}_4$  was carried out with a Miniflex 600 diffractometer equipped with an incident beam monochromator set of Cu  $K\alpha$  radiation ( $\lambda = 1.5418 \text{ \AA}$ ), and the  $2\theta$  range of  $5\text{-}70^\circ$ , with a scan step width of  $0.02^\circ$  and a scanning rate of  $3^\circ \text{ min}^{-1}$  (Figure S2).

### **Elemental Analysis.**

Semiquantitative microprobe analyses on the  $\text{MLASnCl}_4$  crystal were performed with the aid of a field emission scanning electron microscope (Nova NanoSEM 230) equipped with an energy-dispersive X-ray spectroscope (EDS). The energy dispersive spectra were collected on visibly clean surfaces of the samples and confirmed the presence of Sn, Cl, C,

and N elements in an average ratio of Sn:Cl = 1:4.25, which is well consistent with that determined by single-crystal XRD analysis (Figure S3).

### **Thermal Stability.**

The thermal stability was investigated by the differential thermal analysis (DTA) on a simultaneous NETZSCH STA 449C thermal analyzer in an atmosphere of flowing N<sub>2</sub>. About 8.25 mg MLASnCl<sub>4</sub> powders were placed into an Al<sub>2</sub>O<sub>3</sub> crucible, and heated at a rate of 10 K·min<sup>-1</sup> from room temperature to 800 K (Figure S4).

### **UV-Vis-NIR Diffuse Reflectance Spectroscopy.**

The UV-Vis-NIR diffuse reflection data were recorded at room temperature using a powdered BaSO<sub>4</sub> sample as a standard (100% reflectance) on a PerkinElmer Lambda-950 UV/Vis/NIR spectrophotometer. The scanning wavelength range is 200 to 800 nm (Figure S5). Absorption (K/S) data were calculated by Kubelka-Munk function:<sup>3</sup>

$$F(R) = (1-R)^2/(2R) = K/S$$

Where R is the reflectance, K is the absorption, and S is the scattering. In the (K/S) versus E plot, extrapolating the linear portion of the rising curve to zero gives rise to the onset of absorption.

### **IR Analysis.**

Infrared spectroscopy (IR) in the wavenumber range of 4000–500 cm<sup>-1</sup> was recorded on the Bruker Vertex 70 infrared spectrometer.

## **Birefringence Measurements.**

The birefringence of  $\text{MLASnCl}_4$  was characterized by using the polarizing microscope (NIKON ECLIPSE LV100N POL) equipped with a Berek compensator. The wavelength of the light source was 550 nm. Owing to the clear boundary lines of the first-, second-, and third-order interference color, the relative error was small enough. Before the scanning, the small and transparent  $\text{MLASnCl}_4$  lamellar crystal was chosen to measure, to improve the accuracy of the birefringence. The thickness of the selected crystal was measured on the polarizing microscope.

The formula for calculating the birefringence is listed below,

$$R = |n_e - n_o| \times T = \Delta n \times T$$

Here, R represents the optical path difference,  $\Delta n$  means the birefringence, and T denotes the thickness of the crystal.

## **Computational Methods.**

The first-principles calculations of electronic structure, band structure, and optical properties of  $\text{MLASnCl}_4$  were carried out by using the CASTEP software<sup>4</sup> to understand the relationship between structure and properties. The generalized gradient approximation (GGA) was adopted, and Perdew-Burke-Ernzerhof (PBE) functional was chosen to calculate the exchange-correlation potential,<sup>5,6</sup> with an energy cutoff of more than 750 eV for  $\text{MLASnCl}_4$ . The Brillouin zone was sampled using the Monkhorst-Pack k-point sampling of  $2 \times 8 \times 3$ . First of all, the atomic positions in the unit cell have been fully optimized using the GGA method with an energy cutoff of 1400 eV convergence to  $10^{-7}$  eV. The band structure and density of states (DOS)/partial DOS were computed based on the energy convergence to  $10^{-6}$  eV and  $10^{-7}$  eV, respectively. The linear optical properties were examined based on the dielectric function  $\epsilon(\omega) = \epsilon_1(\omega) + i\epsilon_2(\omega)$ . The imaginary part

of the dielectric function  $\epsilon_2$  can be calculated based on the electronic structures and the real part is obtained by the Kramers-Kronig transformation, accordingly, the refractive indices and the birefringence ( $\Delta n$ ) can be calculated. The frequency-dependent refractive indices were calculated to demonstrate the validity of birefringence measurements.

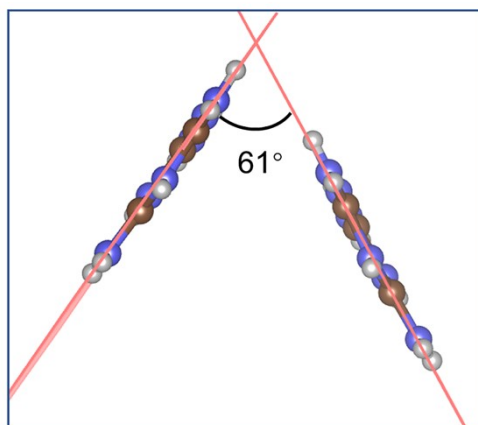

Figure S1. The observed dihedral angle in the compound between melamine cationic planes.

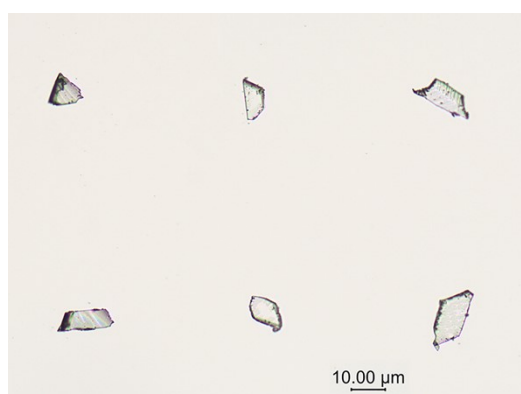

Figure S2. The photograph of the synthesized colorless transparent single crystals.

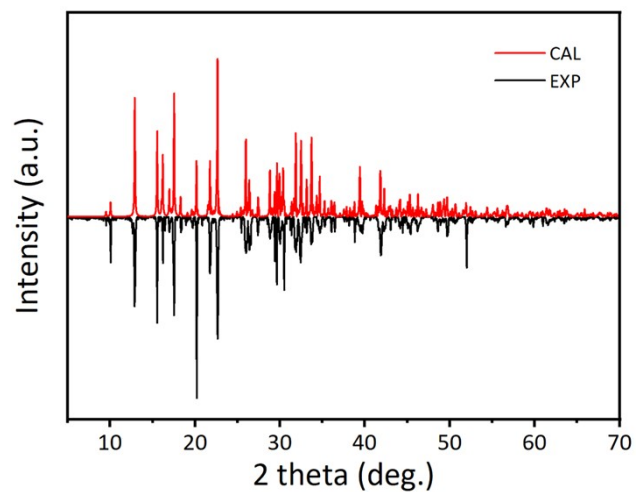

**Figure S3.** Experimental and calculated PXRD patterns of MLASnCl<sub>4</sub>.

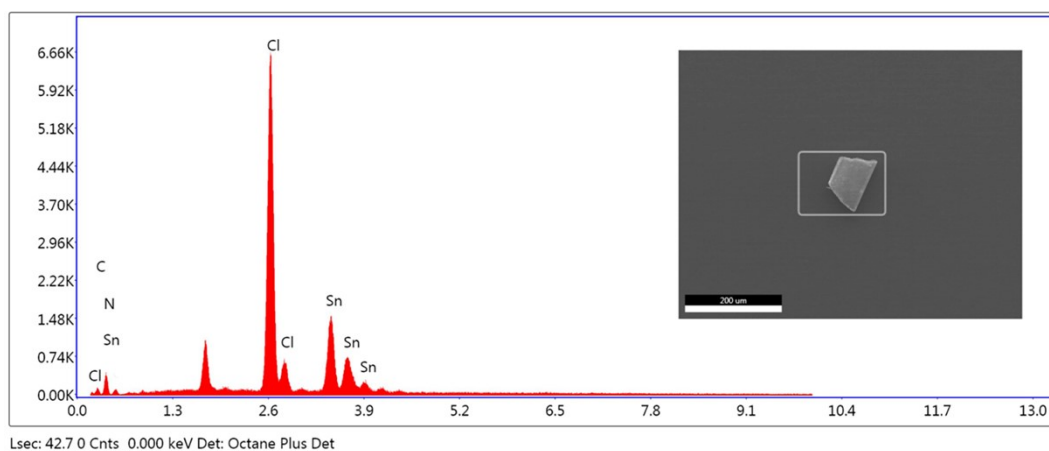

**Figure S4.** Energy dispersive X-ray (EDX) analysis of MLASnCl<sub>4</sub>.



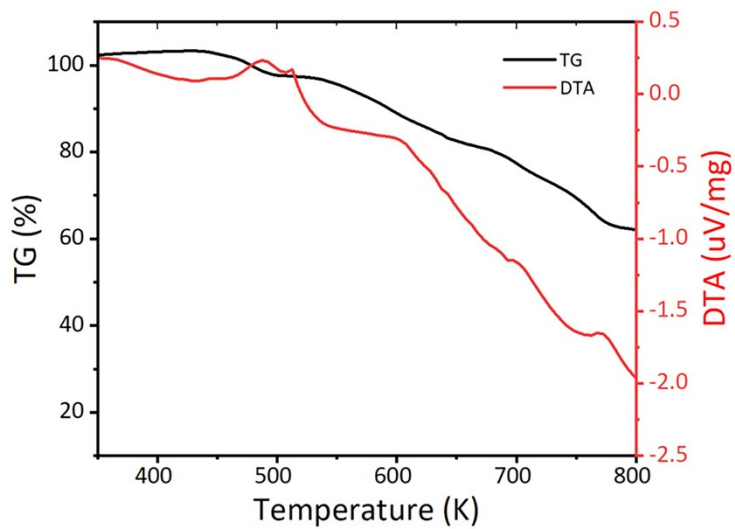

**Figure S5.** TG and DTA diagrams of  $\text{MLASnCl}_4$ .

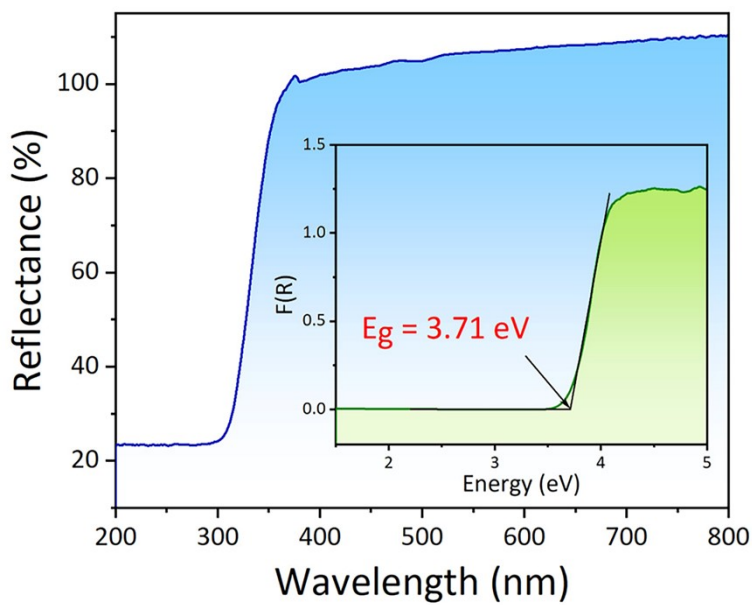

**Figure S6.** UV-vis-NIR-infrared diffuse reflectance spectrum of  $\text{MLASnCl}_4$ .

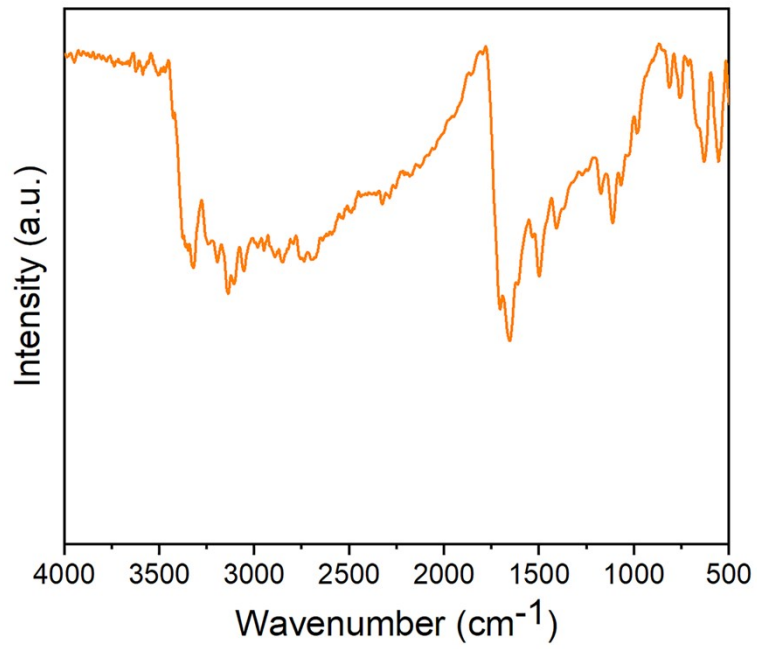

**Figure S7.** IR spectrum of MLASnCl<sub>4</sub>.

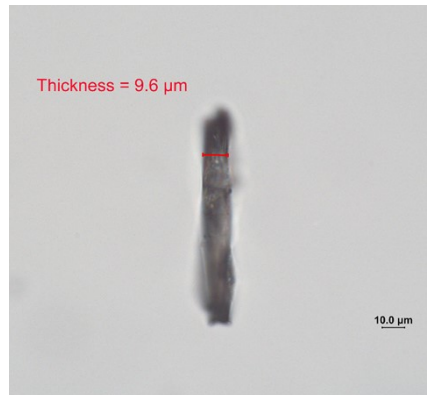

**Figure S8.** The thickness of the selected MLASnCl<sub>4</sub> crystal plate.

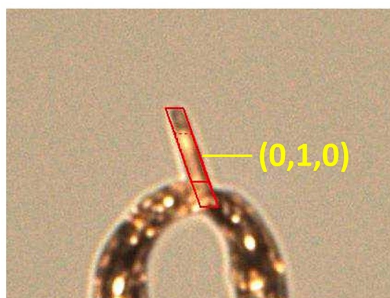

**Figure S9.** The crystal orientation of the selected  $\text{MLASnCl}_4$  plate determined by single-crystal XRD.

**Table S1.** Crystallographic data and structure refinement for MLASnCl<sub>4</sub>.

|                                                     |                                                                  |
|-----------------------------------------------------|------------------------------------------------------------------|
| Empirical formula                                   | C <sub>3</sub> N <sub>6</sub> H <sub>8</sub> SnCl <sub>4</sub>   |
| Formula weight                                      | 388.64                                                           |
| Temperature (K)                                     | 298.4(3)                                                         |
| Crystal system, space group                         | Orthorhombic, <i>Pna</i> 2 <sub>1</sub>                          |
| a (Å)                                               | 21.8661(7)                                                       |
| b (Å)                                               | 6.0217(2)                                                        |
| c (Å)                                               | 17.5955(5)                                                       |
| $\alpha$ /°                                         | 90                                                               |
| $\beta$ /°                                          | 90                                                               |
| $\gamma$ /°                                         | 90                                                               |
| Volume (Å <sup>3</sup> )                            | 2316.82(13)                                                      |
| Z                                                   | 8                                                                |
| $\rho_{\text{calc}}$ (g/cm <sup>3</sup> )           | 2.228                                                            |
| $\mu$ (mm <sup>-1</sup> )                           | 3.100                                                            |
| F(000)                                              | 1488.0                                                           |
| Crystal size (mm)                                   | 0.12 × 0.10 × 0.06                                               |
| Theta range for data collection (deg.)              | 3.726 to 58.52                                                   |
| Limiting indices                                    | -27 ≤ h ≤ 22, -4 ≤ k ≤ 7, -22 ≤ l ≤ 15                           |
| Reflections collected                               | 7389                                                             |
| Independent reflections                             | 3870 [ $R_{\text{int}} = 0.0232$ , $R_{\text{sigma}} = 0.0369$ ] |
| Data/restraints/parameters                          | 3870/1/254                                                       |
| Goodness-of-fit on F <sup>2</sup>                   | 1.025                                                            |
| Final R indices [ $I > 2\sigma(I)$ ] <sup>[a]</sup> | $R_1 = 0.0329$ , $wR_2 = 0.0824$                                 |
| R indices (all data)                                | $R_1 = 0.0382$ , $wR_2 = 0.0852$                                 |
| Largest diff. peak and hole(e.A <sup>-3</sup> )     | 1.69/-1.12                                                       |

[a]  $R_1 = \Sigma||F_o| - |F_c||/\Sigma|F_o|$  and  $wR_2 = [\Sigma w(F_o^2 - F_c^2)^2/\Sigma wF_o^4]^{1/2}$  for  $F_o^2 > 2\sigma(F_o^2)$ .

**Table S2.** Atomic coordinates ( $\times 10^4$ ) and equivalent isotropic displacement parameters ( $\text{\AA}^2 \times 10^3$ ) for  $\text{MLASnCl}_4$ .

| Atom | $x/a$      | $y/b$     | $z/c$      | $U_{\text{eq}}^{\text{[a]}}$ |
|------|------------|-----------|------------|------------------------------|
| Sn1  | 7298.7(2)  | 1901.9(8) | 3377.6(3)  | 25.63(13)                    |
| Sn2  | 5157.4(2)  | 6846.5(8) | 6625.5(2)  | 25.52(13)                    |
| Cl1  | 8190.4(8)  | 1912(3)   | 4471.5(12) | 34.6(5)                      |
| Cl2  | 5179.5(8)  | 11011(4)  | 6485.1(14) | 39.8(5)                      |
| Cl3  | 4262.2(8)  | 7011(4)   | 5517.5(13) | 34.3(4)                      |
| Cl4  | 5843.9(8)  | 6090(4)   | 5444.1(11) | 34.2(4)                      |
| Cl5  | 7276.1(8)  | 6037(4)   | 3584.6(13) | 36.5(5)                      |
| Cl6  | 6378.2(12) | 7231(4)   | 7366.4(14) | 41.7(5)                      |
| Cl7  | 6095.0(10) | 2405(4)   | 2616.9(15) | 37.2(5)                      |
| Cl8  | 6617.5(8)  | 1076(4)   | 4539.4(11) | 34.6(4)                      |
| C1   | 2181(4)    | 12288(15) | 6319(5)    | 23.6(16)                     |
| C2   | 3205(3)    | 11981(13) | 6473(4)    | 26.3(17)                     |
| C3   | 4777(3)    | 949(13)   | 4201(4)    | 24.7(15)                     |
| C4   | 4245(3)    | -1835(12) | 3520(4)    | 25.9(17)                     |
| C5   | 5269(4)    | -2182(16) | 3685(6)    | 26.7(17)                     |
| C6   | 2680(3)    | 9160(12)  | 5794(4)    | 24.6(15)                     |
| N1   | 4785(3)    | 2758(14)  | 4596(6)    | 36(2)                        |
| N2   | 1658(3)    | 13300(11) | 6424(4)    | 36.2(18)                     |
| N3   | 5794(3)    | -3205(11) | 3572(4)    | 36.7(18)                     |
| N4   | 3720(3)    | -2549(12) | 3274(5)    | 35.4(19)                     |
| N5   | 3726(3)    | 12727(13) | 6724(5)    | 38(2)                        |
| N6   | 5286(2)    | -251(12)  | 4090(4)    | 27.3(14)                     |
| N7   | 3195(2)    | 9939(10)  | 6106(3)    | 25.9(13)                     |
| N8   | 4753(3)    | -3008(11) | 3414(4)    | 27.7(13)                     |
| N9   | 2165(3)    | 10344(11) | 5900(4)    | 27.3(14)                     |
| N10  | 2694(2)    | 13128(10) | 6577(4)    | 27.7(14)                     |
| N11  | 2672(3)    | 7333(16)  | 5401(6)    | 39(2)                        |
| N12  | 4261(2)    | 186(10)   | 3896(3)    | 25.8(12)                     |

[a]  $U_{\text{eq}}$  is defined as one-third of the trace of the orthogonalized  $U_{ij}$  tensor.

**Table S3.** Selected bond distances (Å) for MLASnCl<sub>4</sub>.

|         |            |        |           |
|---------|------------|--------|-----------|
| Sn1-Cl1 | 2.740(2)   | N6-C3  | 1.341(9)  |
| Sn1-Cl8 | 2.5779(19) | N6-C5  | 1.365(11) |
| Sn1-Cl5 | 2.517(2)   | N8-C4  | 1.329(9)  |
| Sn1-Cl7 | 2.968(2)   | N8-C5  | 1.323(10) |
| Sn2-Cl4 | 2.6042(19) | N10-C2 | 1.326(9)  |
| Sn2-Cl6 | 2.980(3)   | N12-C4 | 1.386(9)  |
| Sn2-Cl2 | 2.521(2)   | N12-C3 | 1.331(9)  |
| Sn2-Cl3 | 2.764(2)   | N3-C5  | 1.317(10) |
| N1-C3   | 1.292(11)  | N7-C6  | 1.339(9)  |
| C1-N10  | 1.312(10)  | N7-C2  | 1.388(10) |
| C1-N2   | 1.308(10)  | C6-N9  | 1.345(9)  |
| C1-N9   | 1.384(11)  | C6-N11 | 1.300(11) |
| N4-C4   | 1.298(10)  | C2-N5  | 1.302(10) |

**Table S4.** Selected bond angles (deg.) for MLASnCl<sub>4</sub>.

|             |           |           |          |
|-------------|-----------|-----------|----------|
| Cl1-Sn1-Cl7 | 161.37(7) | C3-N12-C4 | 121.2(6) |
| Cl8-Sn1-Cl1 | 81.64(6)  | N4-C4-N8  | 121.0(7) |
| Cl8-Sn1-Cl7 | 82.23(7)  | N4-C4-N12 | 118.3(7) |
| Cl5-Sn1-Cl1 | 84.84(6)  | N8-C4-N12 | 120.7(6) |
| Cl5-Sn1-Cl8 | 93.71(7)  | C6-N7-C2  | 120.9(6) |
| Cl5-Sn1-Cl7 | 86.96(6)  | N7-C6-N9  | 117.5(6) |
| Cl4-Sn2-Cl6 | 81.17(6)  | N11-C6-N7 | 121.7(6) |
| Cl4-Sn2-Cl3 | 81.46(6)  | N11-C6-N9 | 120.8(6) |
| Cl2-Sn2-Cl4 | 94.87(7)  | C6-N9-C1  | 120.1(6) |
| Cl2-Sn2-Cl6 | 87.04(6)  | N1-C3-N6  | 121.5(7) |
| Cl2-Sn2-Cl3 | 84.77(7)  | N1-C3-N12 | 121.3(7) |
| Cl3-Sn2-Cl6 | 160.07(7) | N12-C3-N6 | 117.3(7) |
| N10-C1-N9   | 122.1(7)  | N10-C2-N7 | 120.8(7) |
| N2-C1-N10   | 121.3(8)  | N5-C2-N10 | 120.6(7) |
| N2-C1-N9    | 116.5(7)  | N5-C2-N7  | 118.5(7) |
| C3-N6-C5    | 120.9(7)  | N8-C5-N6  | 122.0(7) |

|           |          |          |          |
|-----------|----------|----------|----------|
| C5-N8-C4  | 117.7(7) | N3-C5-N6 | 117.0(8) |
| C1-N10-C2 | 118.2(7) | N3-C5-N8 | 120.9(8) |

**Table S5.** Anisotropic displacement parameters ( $\text{\AA}^2$ ) for  $\text{MLASnCl}_4$ .

| Atom | $U_{11}$ | $U_{22}$ | $U_{33}$ | $U_{23}$ | $U_{13}$ | $U_{12}$  |
|------|----------|----------|----------|----------|----------|-----------|
| Sn1  | 28.0(2)  | 23.9(3)  | 24.9(2)  | -2.0(2)  | 2.0(2)   | 0.69(18)  |
| Sn2  | 28.3(2)  | 22.4(3)  | 25.9(2)  | 0.0(3)   | 1.9(2)   | -0.61(18) |
| C11  | 29.3(8)  | 39.2(14) | 35.2(10) | 9.5(9)   | -2.6(8)  | -6.5(8)   |
| C12  | 31.5(8)  | 22.4(11) | 65.7(17) | 0.0(10)  | -1.5(9)  | -1.1(8)   |
| C13  | 29.1(8)  | 39.4(13) | 34.5(10) | -9.3(9)  | -2.4(8)  | 7.3(8)    |
| C14  | 28.2(7)  | 46.0(13) | 28.4(8)  | 1.6(8)   | 1.6(7)   | 8.3(8)    |
| C15  | 32.6(8)  | 24.1(11) | 52.7(13) | -1.6(8)  | -4.1(8)  | 0.7(8)    |
| C16  | 59.2(13) | 30.9(13) | 35.0(14) | 5.3(8)   | 0.9(11)  | -0.6(10)  |
| C17  | 51.5(11) | 26.7(12) | 33.3(12) | -2.2(8)  | -2.4(10) | 3.7(9)    |
| C18  | 27.8(7)  | 47.7(13) | 28.4(8)  | -0.8(8)  | 0.3(7)   | -7.1(8)   |
| C1   | 26(3)    | 24(4)    | 21(4)    | -2(3)    | 2(4)     | 1(3)      |
| C2   | 26(3)    | 27(5)    | 26(4)    | 4(3)     | -2(3)    | 6(3)      |
| C3   | 36(3)    | 19(4)    | 19(3)    | 0(3)     | -3(3)    | 3(3)      |
| C4   | 29(3)    | 22(4)    | 27(4)    | 4(3)     | -3(3)    | 0(3)      |
| C5   | 27(3)    | 31(5)    | 22(4)    | -1(3)    | 5(3)     | 3(3)      |
| C6   | 31(3)    | 21(4)    | 22(3)    | 3(3)     | 0(3)     | 3(3)      |
| N1   | 39(4)    | 30(5)    | 39(5)    | -8(3)    | -12(3)   | 6(3)      |
| N2   | 25(3)    | 43(5)    | 41(4)    | -10(3)   | 1(3)     | 8(3)      |
| N3   | 28(3)    | 44(5)    | 38(4)    | -9(3)    | 0(3)     | 9(3)      |
| N4   | 30(3)    | 21(4)    | 55(6)    | -9(3)    | -8(4)    | 2(3)      |
| N5   | 32(3)    | 32(4)    | 50(6)    | -6(3)    | -17(4)   | 0(3)      |
| N6   | 24(3)    | 28(4)    | 29(3)    | -8(3)    | -4(3)    | 1(3)      |
| N7   | 24(2)    | 22(3)    | 31(3)    | -2(3)    | -5(2)    | 8(3)      |
| N8   | 29(3)    | 26(4)    | 28(3)    | -5(3)    | -4(3)    | 3(2)      |
| N9   | 24(2)    | 27(4)    | 31(3)    | -5(3)    | -3(3)    | -2(3)     |
| N10  | 27(3)    | 29(4)    | 27(3)    | -3(3)    | 1(3)     | 3(2)      |
| N11  | 44(4)    | 34(5)    | 41(5)    | -15(4)   | -3(4)    | 7(3)      |
| N12  | 27(3)    | 19(3)    | 31(3)    | -1(3)    | -1(2)    | 8(3)      |

**Table S6.** The bond valence sum (BVS) for all atoms in [SnCl<sub>4</sub>] unit for MLASnCl<sub>4</sub>. The bond valences for each atom in [SnCl<sub>4</sub>] unit are calculated according to the following equation: bond valence = exp[(R<sub>0</sub>-R)/B], where R is the bond length. The bond valence parameter is as follow: R<sub>0</sub>(Sn-Cl) = 2.36 Å, B(Sn-Cl) = 0.37 Å.<sup>7</sup>

|     |      |     |      |
|-----|------|-----|------|
| Sn1 | 1.76 | Cl4 | 0.63 |
| Sn2 | 1.69 | Cl5 | 0.65 |
| Cl1 | 0.59 | Cl6 | 0.64 |
| Cl2 | 0.65 | Cl7 | 0.63 |
| Cl3 | 0.61 | Cl8 | 0.61 |

## References

- (1) G. M. Sheldrick, A short history of SHELX, *Acta Crystallogr. Sect. A: Found. Crystallogr.* **2008**, *64*, 112-122.
- (2) A. L. Spek, Single-crystal structure validation with the program PLATON, *J. Appl. Crystallogr.* **2003**, *36*, 7-13.
- (3) J. Tauc, Absorption Edge and Internal Electric Fields in Amorphous Semiconductors, *Mater. Res. Bull.* **1970**, *5*, 721.
- (4) G. Kresse, J. Furthmuller, Efficient iterative schemes for *ab initio* total-energy calculations using a plane-wave basis set, *Phys. Rev. B.* **1996**, *54*, 11169-11186.
- (5) J. P. Perdew, K. A. Jackson, M. R. Pederson, D. J. Singh, C. Fiolhais, Erratum: Atoms, molecules, solids, and surfaces: Applications of the generalized gradient approximation for exchange and correlation, *Phys. Rev. B.* **1993**, *46*, 6671.
- (6) J. P. Perdew, K. Burke, M. Ernzerhof, Generalized Gradient Approximation Made Simple, *Phys. Rev. Lett.* **1996**, *77*, 3865.
- (7) I. D. Brown, D. Altermatt, Bond-valence parameters obtained from a systematic analysis of the Inorganic Crystal Structure Database, *Acta Crystallogr., Sect. B: Struct. Sci.*, **1985**, *41*, 244-247.
